# Supplementary material for: Testis electroporation coupled with autophagy inhibitor to treat non-obstructive azoospermia
Source: PubMed Central journal article supplement — Mol Ther Nucleic Acids. 2022 Nov 9;30:451–64. doi: 10.1016/j.omtn.2022.10.022 (PMC9672891; doi:10.1016/j.omtn.2022.10.022), 2022-11-09
Supplement: mmc1.pdf [file mmc1.pdf]

**OMTN, Volume 30**

**Supplemental information**

**Testis electroporation**

**coupled with autophagy inhibitor**

**to treat non-obstructive azoospermia**

**Liyang Wang, Chao Liu, Huafang Wei, Yingchun Ouyang, Mingzhe Dong, Ruidan Zhang, Lina Wang, Yinghong Chen, Yanjie Ma, Mengmeng Guo, Yang Yu, Qing-Yuan Sun, and Wei Li**

## Supplemental Information

### Supplemental Figures and Figure legends

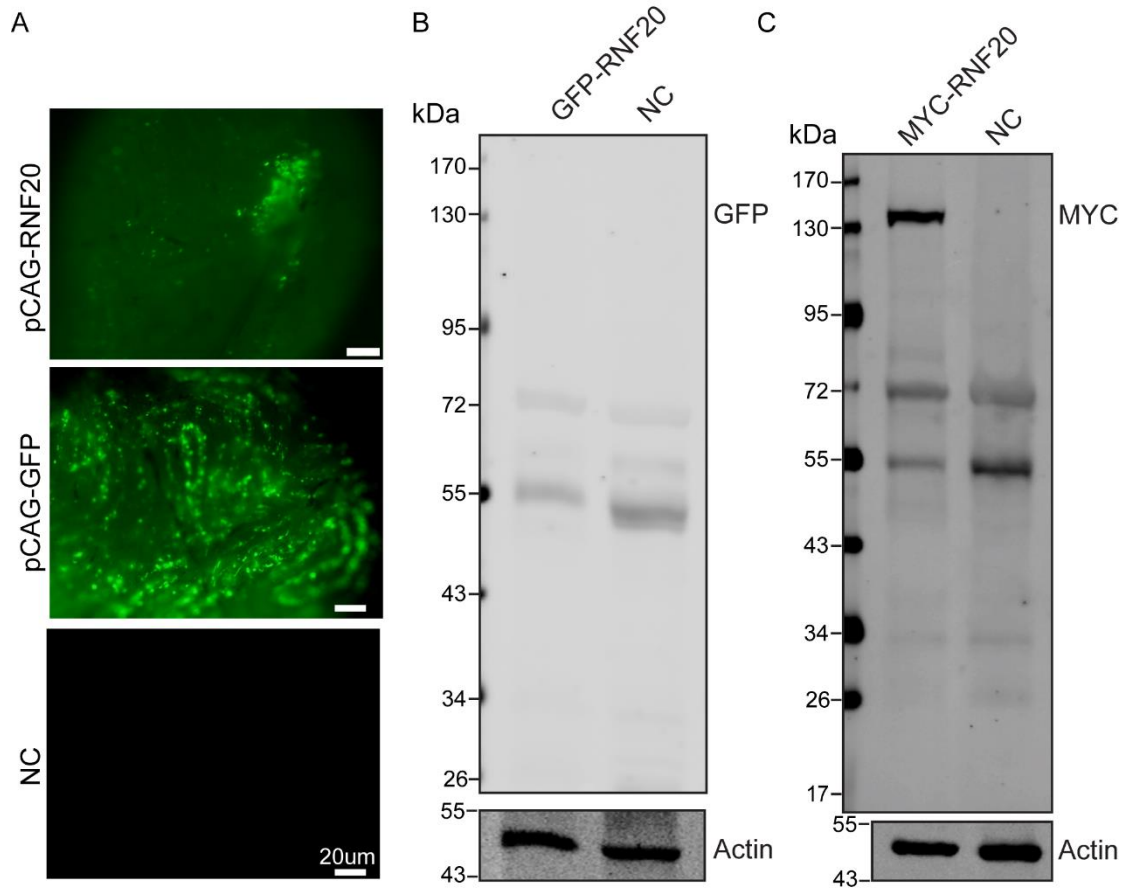

**Figure S1. Expression of exogenous RNF20 in testes after electroporation.**

(A) Representative images of the expression of GFP-RNF20 in testes after electroporation. Scale bar, 20 μm.

(B-C) Western blot analysis of testis extracts after electroporation. Actin served as a loading control.

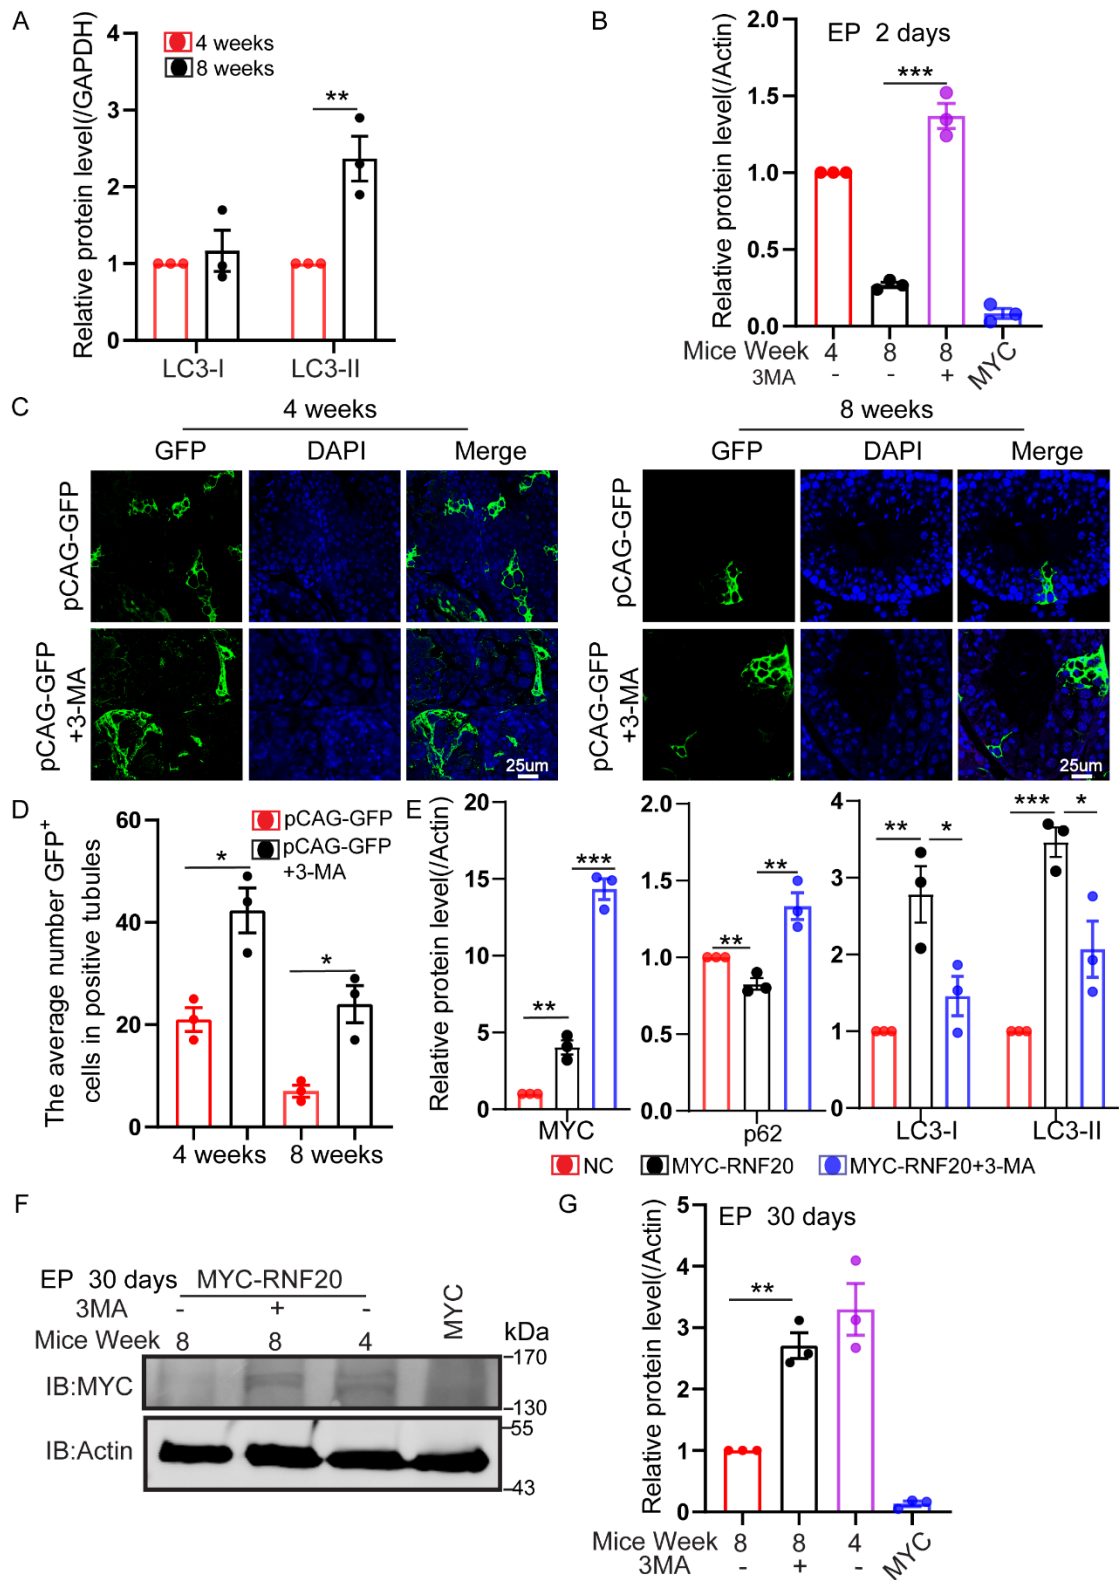

**Figure S2. The efficiency of electroporation is increased by adding autophagy inhibitor 3-MA in 4-week-old and 8-week-old mouse testes after electroporation.**

(A) Relative protein levels of LC3 in 4-week-old and 8-week-old mouse testes. n=3

biological replicates. Data are presented as mean  $\pm$  SEM. \*\* $p < 0.01$ . Statistical analysis was performed with two-tailed unpaired student's t test.

(B) Quantification of the MYC-RNF20 levels in testes after 2 days of electroporation.  $n=3$  biological replicates. Data are presented as mean  $\pm$  SEM. \*\*\* $p < 0.001$ . Statistical analysis was performed with two-tailed unpaired student's t test.

(C) The efficiency of electroporation is increased by adding autophagy inhibitor 3-MA in 4-week-old and 8-week-old mouse testes. Scale bar, 25 $\mu$ m.

(D) Quantification of the GFP positive signals in (C).  $n=3$  biological replicates. Data are presented as mean  $\pm$  SEM. \* $p < 0.05$ . Statistical analysis was performed with two-tailed unpaired student's t test.

(E) Quantification of the MYC-RNF20, LC3 and p62 levels in 8-week-old mouse testes after 2 days of electroporation.  $n=3$  biological replicates. Data are presented as mean  $\pm$  SEM. \* $p < 0.05$ , \*\* $p < 0.01$  and \*\*\* $p < 0.001$ . Statistical analysis was performed with two-tailed unpaired student's t test.

(F) Western blotting analysis of testis extracts after electroporation. Actin served as a loading control.

(G) Quantification of the MYC-RNF20 levels in (F).  $n=3$  biological replicates. Data are presented as mean  $\pm$  SEM. \*\* $p < 0.01$ . Statistical analysis was performed with two-tailed unpaired student's t test.

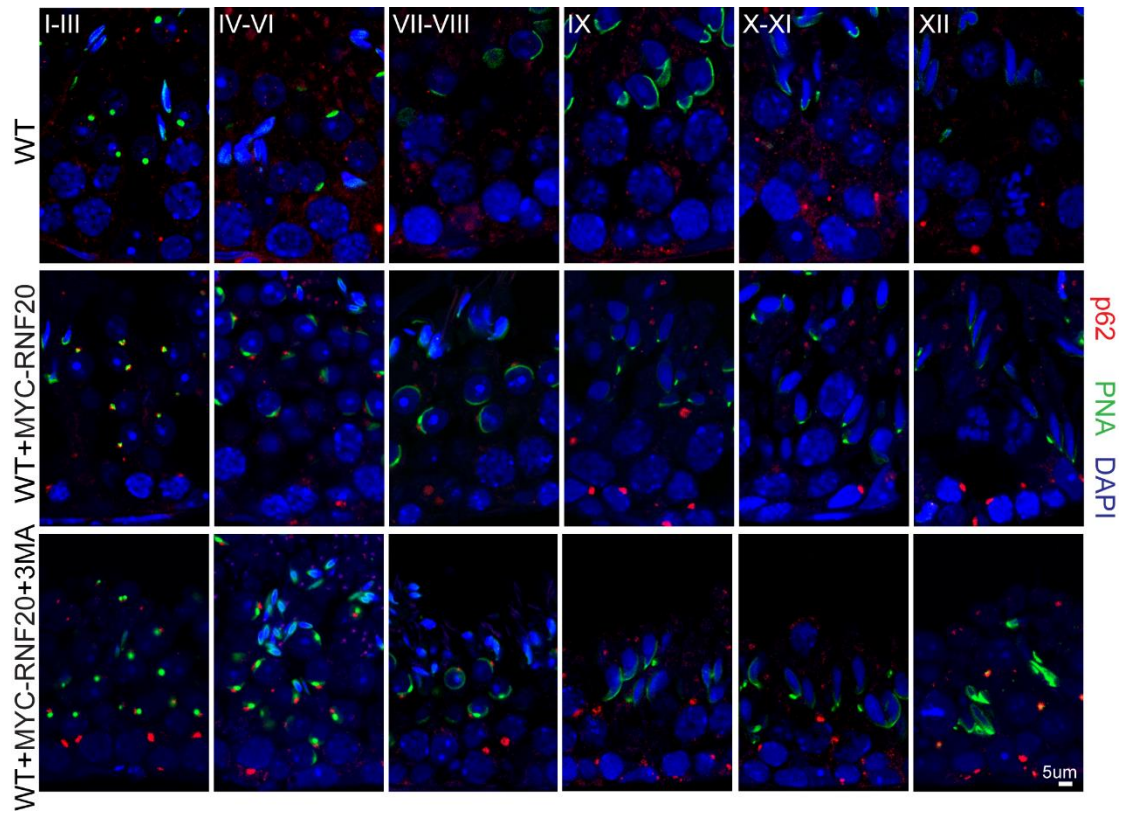

**Figure S3. Expression levels of p62 in mouse testes.**

Expression levels of p62 are increased in mouse testes treated with autophagy inhibitor

3-MA after electroporation. Scale bar, 5µm.

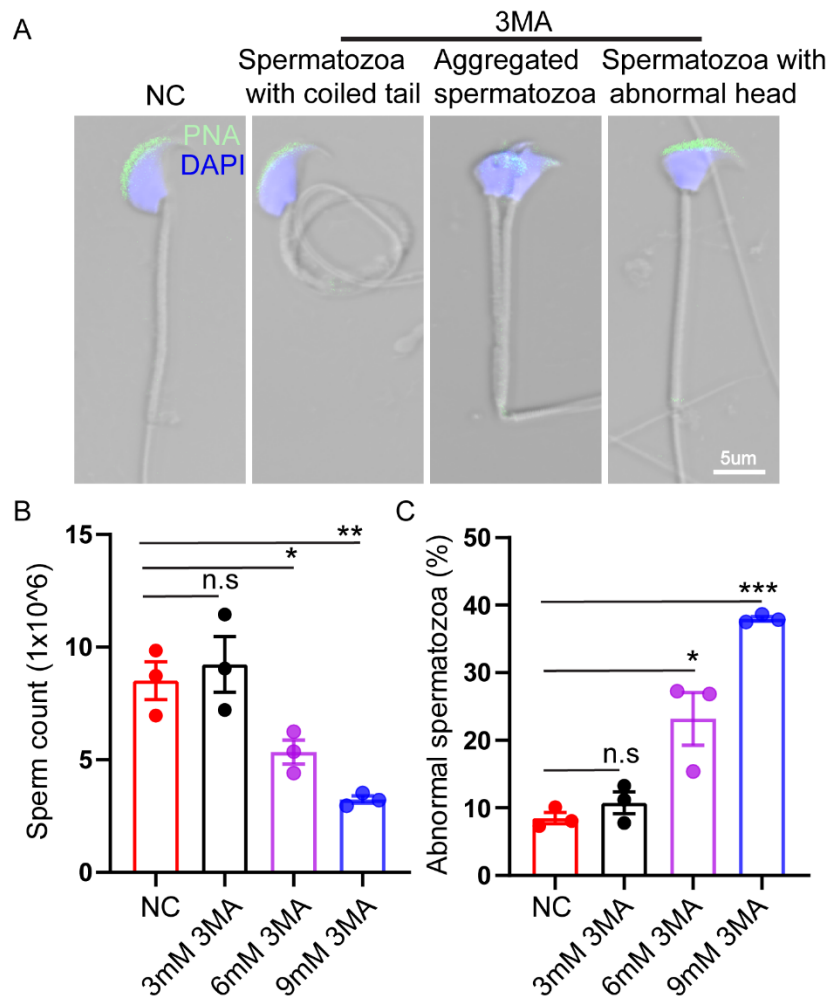

Figure S4. High concentration of 3-MA results in abnormal spermatozoa.

(A) PNA staining of spermatozoa from the epididymis of 0.9% NaCl (NC group) or 3-MA injected mice for 3 weeks. Scale bar, 5µm.

(B) Sperm counts in the caudal epididymidis were detected in 3mM, 6mM and 9mM 3-MA injected mice. n=3 biological replicates. Data are presented as mean ± SEM. n.s, non-significant, \*p < 0.05 and \*\*p < 0.01. Statistical analysis was performed with two-tailed unpaired student's t test.

(C) Quantification of abnormal spermatozoa in (B). n=3 biological replicates. Data are presented as mean ± SEM. n.s, non-significant, \*p < 0.05 and \*\*\*p < 0.001. Statistical analysis was performed with two-tailed unpaired student's t test.
